# 1 Predicting the Environmental Suitability and Population at Risk of

## 2 Podoconiosis in Africa

3

4 Kebede Deribe<sup>1,2\*</sup>, Hope Simpson<sup>3</sup>, Rachel L. Pullan<sup>3</sup>, Mbonigaba Jean Bosco<sup>4</sup>, Samuel Wanji<sup>5,6</sup>,  
5 Nicole Davis Weaver<sup>7</sup>, Christopher J. L. Murray<sup>7,8</sup>, Melanie J. Newport<sup>1</sup>, Simon I. Hay<sup>7,8</sup>, Gail  
6 Davey<sup>1,2</sup>, Jorge Cano<sup>3</sup>

- 7 1. Department of Global Health and Infection, Brighton and Sussex Medical School, Falmer,  
8 Brighton, BN1 9PX, UK.
- 9 2. School of Public Health, College of Health Sciences, Addis Ababa University, Addis  
10 Ababa, Ethiopia.
- 11 3. Department of Disease Control, London School of Hygiene & Tropical Medicine,  
12 London, UK.
- 13 4. Malaria and Other Parasitic Disease Division, Rwanda Biomedical Center–Ministry of  
14 Health, Kigali, Rwanda.
- 15 5. Parasites and Vector Biology Research Unit (PAVBRU), Department of Microbiology  
16 and Parasitology, University of Buea, Buea, Cameroon.
- 17 6. Research Foundation in Tropical Diseases and the Environment (REFOTDE), Buea,  
18 Cameroon.
- 19 7. Institute for Health Metrics and Evaluation, University of Washington, Seattle, WA,  
20 USA.
- 21 8. Department of Health Metrics Sciences, University of Washington, Seattle, WA, USA.

22  
23

24

25

## 26 **Abstract**

### 27 **Background**

29 Podoconiosis is a type of tropical lymphedema that causes massive swelling of the lower limbs. The disease is  
30 associated with both economic insecurity, due to long-term morbidity-related loss of productivity, and intense social  
31 stigma. The geographical distribution and burden of podoconiosis in Africa is uncertain.

### 32 **Methods**

33 We applied statistical modelling to the most comprehensive database compiled to date to predict the environmental  
34 suitability of podoconiosis in the African continent. By combining climate and environmental data and overlaying  
35 population figures, we predicted the suitability and human population at risk.

37 **Results:** In Africa, environmental suitability for podoconiosis was predicted in 29 countries. By 2020, the total  
38 population in areas suitable for podoconiosis was estimated at 114.5 million people, (95% confidence interval: 109.4-  
39 123.9) with 16.9 million in areas suitable for both lymphatic filariasis and podoconiosis. Of the total 5,712  
40 implementation units defined by WHO in Africa, 1,655 (29.0%) were found to be environmentally suitable for  
41 podoconiosis. The majority of IUs with high environmental suitability are located in Angola (80 IUs), Cameroon (170  
42 IUs), the DRC (244 IUs), Ethiopia (495 IUs), Kenya (217 IUs), Uganda (116 IUs) and Tanzania (112 IUs). Of the  
43 1,655 environmental suitable IUs, 960 (58.0%) require more detailed community-level mapping

### 44 **Conclusions**

45 Our estimates provide key evidence of the population at risk and geographical extent of podoconiosis in Africa, which  
46 will help decision-makers to better plan more integrated intervention programmes.

47  
48

## 49 Introduction

50  
51 Podoconiosis is a neglected tropical disease (NTDs) caused by exposure to red clay soil<sup>1</sup> in genetically  
52 susceptible people who do not use footwear. It is one of the leading causes of lymphoedema in Africa<sup>2,3</sup>. The  
53 disease is a disabling NTD which causes progressive bilateral swelling of the legs, significantly reducing quality  
54 of life<sup>4</sup> and productivity<sup>5</sup>. People affected by podoconiosis also suffer comorbid mental distress and depression<sup>6</sup>,  
55 stigma and discrimination<sup>7,8</sup>. The current intervention includes prevention through consistent footwear usage  
56 starting from an early age, regular foot hygiene and covering housing floors<sup>9</sup>. For those with the disease, the  
57 WHO recommends simple lymphoedema management consisting of foot hygiene, foot care, wound care,  
58 compression, exercises and elevation, treatment of acute attacks and use of shoes and socks to reduce further  
59 exposure to the irritant soil<sup>10,11</sup>. Podoconiosis is one of the diseases with potential for elimination, due to the fact  
60 that it is non-infectious and there are proven prevention and treatment interventions<sup>9</sup>. Historical evidence shows  
61 that it has already been eliminated from northern African countries including Algeria, Morocco and Tunisia<sup>3</sup>.

62 Although precise estimates are lacking, evidence suggests that globally, four million people are disabled by  
63 podoconiosis in 27 countries thought to be endemic<sup>12,13</sup>. In Africa, podoconiosis has been reported in 18  
64 countries, mostly in the East and West African regions. Nonetheless, most of the data originate from the  
65 1970s<sup>12</sup>, such that the current situation is unclear. Podoconiosis is often misdiagnosed and confused with other  
66 causes of lymphoedema<sup>14</sup>. In a study conducted in an endemic zone in Ethiopia, around half of health workers  
67 interviewed inaccurately thought podoconiosis to be an infectious disease transmitted by mosquitoes, and of  
68 those who had treated podoconiosis, 71% prescribed diethylcarbamazine assuming that lymphatic filariasis (LF)  
69 was the cause<sup>14</sup>. Misdiagnosis of podoconiosis may not only lead to underestimation of the burden of  
70 podoconiosis, but also to underestimation of the success of LF elimination programmes, by overestimating the  
71 morbidity burden due to LF<sup>15,16</sup>.

72 Three countries (Cameroon, Ethiopia and Rwanda) have recently mapped the distribution of podoconiosis  
73 through nationwide mapping activities<sup>17-20</sup>, revealing widespread distribution of podoconiosis, constituting a  
74 considerable burden. These studies have also provided new epidemiological insights. Firstly, they identified  
75 climate and topographical factors, such as precipitation, elevation and land surface temperature; environmental  
76 factors such as enhanced vegetation index and proximity to waterways; and soil-related factors such as soil  
77 composition (i.e. clay, silt and clay content) and soil pH, as potential drivers of disease distribution. Other  
78 factors such as night-light emissivity and distance to stable night-lights, considered indirect indicators of poverty  
79<sup>21-23</sup>, were also found to predict the occurrence of podoconiosis<sup>17-20</sup>. Although these factors cannot be  
80 considered *per se* to cause the disease, they have proven to be very informative in predicting the occurrence of  
81 podoconiosis by characterising its environmental niche.

82 Podoconiosis national programmes require a detailed understanding of the geographical distribution of the  
83 disease so that all endemic areas can be targeted. Previous attempts to map podoconiosis include a detailed  
84 literature review<sup>12</sup> and mapping at national<sup>17,19,20</sup> and subnational levels<sup>24-26</sup>. However, there are no maps  
85 outlining the potential distribution of podoconiosis at higher geographical levels. To develop national plans and  
86 investment case programmes, planners and policy makers require robust data on the geographical distribution  
87 and population at risk, and areas to be targeted for more detailed community-level mapping. Podoconiosis and

88 lymphatic filariasis (LF) share a principal clinical manifestation—lymphoedema. In endemic areas these two  
 89 diseases are confused. Understanding the graphical overlaps of these two diseases has clinical and programmatic  
 90 benefits<sup>9</sup>. One of the pillars of LF elimination is morbidity management and disability prevention—i.e.,  
 91 providing access to basic care for LF-related diseases to every affected person in endemic areas<sup>27</sup>. Delineating  
 92 the overlap of LF and podoconiosis will help join hands to provide access to care which will help both  
 93 programmes. In addition, the existing LF programme platform and transmission assessments surveys can be  
 94 used to integrate mapping of podoconiosis and case searches.

95 In the current investigation, we aimed to predict the environmental limits of podoconiosis across the African  
 96 continent, using available data from field surveys and other sources, and empirical evidence of its distribution<sup>17-  
 97 19,28</sup>. Building on methods used to map the distribution of podoconiosis in known endemic countries, we  
 98 developed a model to outline the environmental suitability across Africa. The present work aimed to: i) map the  
 99 geographical distribution of podoconiosis in Africa, ii) estimate the population at risk of podoconiosis, iii)  
 100 determine the number of WHO implementation units (IUs) where mapping is required, and iv) delineate  
 101 overlapping risk of podoconiosis and LF. This work was conducted within the context of the Global Atlas of  
 102 Podoconiosis, which seeks to develop a global map of podoconiosis and estimate its burden<sup>29</sup>.

103

## Methods

### Data sources

We used data recently collected in country-wide and local surveys conducted in Ethiopia, Cameroon and Rwanda<sup>17-20</sup>. These datasets were supplemented with data compiled under the Global Atlas of Podoconiosis, which comprises a number of relevant studies providing evidence of podoconiosis occurrence<sup>12</sup>. The podoconiosis database was first created in 2018, with published literature, case reports and series, and last updated 10 May, 2019. Briefly, we searched for studies that reported the epidemiology of podoconiosis. We searched databases including MEDLINE and SCOPUS from inception to 10 May, 2019 for all relevant studies that examined podoconiosis occurrence, prevalence, incidence and case reports. We used the following search terms; “podoconiosis” OR “mossy foot” OR “non-filarial elephantiasis”. No time or language limits were applied. We hand-searched the reference lists of all recovered documents for additional references. Abstracts of all reports were read and full papers retrieved for those appearing to fulfil selection criteria. Publications were eligible for inclusion in the occurrence if they reported geographical locations with evidence of podoconiosis. We contacted authors of studies to further obtain data and geographic coordinates. We searched the grey literature by seeking reports not published in peer-reviewed journals through contacting experts, a search of conference abstracts and reviewing Price's monograph<sup>3</sup>. Further details on the development of this data repository for podoconiosis are provided elsewhere<sup>12,28</sup>.

### Geo-positioning of survey data

Geographic information extracted from publications included geographical coordinates, when these were available, location names and administrative location (i.e. district, region, or state). When coordinates were not provided, we resorted to geocoders and online electronic gazetteers to identify the most accurate geographic coordinates. Briefly, automated georeferencing was implemented in R software through the Google Maps API Engine and OpenCage Geocoder, using the *ggmap* and *opencage* packages respectively<sup>30,31</sup>. Locations that could not be georeferenced by these methods were manually searched in Google using different gazetteers: Bing Maps<sup>32</sup>, GeoNet Names Server<sup>33</sup>, Fuzzy gazetteers<sup>34</sup> and the Open Street Map project<sup>35</sup>. All geographic coordinates were standardised to decimal degrees in order to be displayed in the WGS84 geographic coordinate system.

### Description of covariates

Data on extrinsic determinants of podoconiosis were assembled from remotely sensed environmental datasets (S1 Appendix). Geographic coordinates of each community were used to extract from gridded maps estimates of: 1) annual precipitation, 2) land surface temperature, 3) distance to water surfaces (water bodies and streams), 4) elevation, 5) enhanced vegetation index (EVI), 6) soil composition (i.e. silt and clay soil fraction) and 7) soil pH. These climate, topographical, environmental and soil-related factors have been found to be associated with the occurrence of podoconiosis in several studies<sup>18-20,36</sup>.

Gridded continuous maps, namely raster datasets, of averaged EVI and land surface temperature (LST) for the period 2000-2017 were generated from MODIS satellite image data downloaded from the Earth Explorer NASA site (<https://earthexplorer.usgs.gov/>). The MOD13Q1 product from MODIS library, which is updated every 16 days at 250m spatial resolution, includes vegetation indices such as Normalized Difference Vegetation Index

(NDVI) and EVI<sup>37</sup>. Day and night LST data were obtained from MOD11A2 products, and have a spatial and temporal resolution of 1km and 8 days respectively<sup>38</sup>.

Information on rainfall was extracted from a synoptic gridded map of annual precipitation calculated from monthly total precipitation gridded datasets obtained from WorldClim v2.0 Global Climate Database<sup>39</sup>. This database provides a set of global climate layers obtained by interpolation of precipitation data for the period 1970–2000 collected in weather stations distributed across the world<sup>40,41</sup>. From the Consortium for Spatial Information (CGIAR-CSI), we obtained a raster dataset of elevation at 1 square-km<sup>42</sup>. This elevation layer resulted from processing and resampling the gridded digital elevation models (DEM) derived from the original 30-arcsecond DEM produced by the Shuttle Radar Topography Mission (SRTM).

Soil data including silt and clay fraction and soil-pH of the top soil, were obtained from the ISRIC-World Soil Information project<sup>43</sup>. This project provides gridded maps of soil composition at 250m resolution worldwide. We also generated continuous surfaces of straight-line distance (Euclidean distance) in km to the nearest water body and permanent rivers based on data obtained from OpenStreetMap project. Waterbodies and waterways were downloaded from the OpenStreetMap project (OSM)<sup>44</sup> through the platform *Geofabrik*<sup>45</sup>.

Input grids were resampled to a common spatial resolution of 5km x 5km using a bilinear interpolation and clipped to the geographic extent of a map displaying Africa limits, and eventually aligned to it. Raster manipulation and processing was undertaken using *raster* package in R v3.3.2 and final map layouts created with ArcGIS 10.5 software (ESRI Inc., Redlands CA, USA).

#### **Data analysis and modelling**

An ensemble of distribution models was generated based on the reported occurrence of podoconiosis in the surveyed communities and the environmental factors. Communities were reclassified as endemic (1) or non-endemic (0) for podoconiosis based on records of confirmed podoconiosis cases.

We used six algorithms available within the BIOMOD framework<sup>46</sup> to obtain ensembles of predicted distributions: generalised linear models (GLM), generalised additive models (GAM), generalised boosted regression models (GBM), artificial neural networks (ANN), multiple adaptive regression splines (MARS), and random forest (RF). These models were run using the parameters set by default in the *biomod2* R package<sup>46</sup>, except for the GBM models. For the latter, the learning rate (*lr*) and tree complexity (*tc*) parameters in boosted regression models, were set to enable up to five interactions, and reducing the speed (*lr*: 0.005) to allow the model to converge without over-fitting. This tuning was undertaken using the *gbm* package in R v3.5.3.

The species distribution models we developed all require training with presence and absence points in order to predict environmental suitability. True absence is difficult to determine in surveys, as the absence of cases identified does not rule out the existence of cases when only a subsample of total population is surveyed. The country-wide mapping surveys conducted in Cameroon, Rwanda and Ethiopia, compiled and used in the current study, targeted the total population of the communities randomly selected across all the administrative regions (i.e. regions/states, districts/zones). Health workers were trained to identify all cases of lymphoedema of lower

limbs within the communities, and podoconiosis was subsequently confirmed by expert clinical diagnostic teams<sup>18,19,47,48</sup>. Therefore, we considered communities not reporting cases as ‘true’ absences and give them the same weight (1) as the presence records in the analysis. To represent absence locations in areas where exhaustive surveys had not been undertaken, we generated random data points, termed ‘pseudo-absence’ records, in countries where the presence of the disease is considered unlikely. This approach has been used in similar modelling studies in the past, and has proven to be helpful when presence and absence data are only available for restricted geographical areas<sup>49,50</sup>. To define the area of assumed unsuitability, we used a recently published map displaying the strength of evidence for presence and absence of podoconiosis across Africa<sup>28</sup>. A sample of *pseudo-absence* points, equal to the number of compiled presence and absence records, was randomly generated from countries with an evidence score below 0 (‘weak to complete evidence of absence’) *Pseudo-absence* records were weighted based on a rescaled version (0 to 1 scale) of the evidence score assigned for this study to each country<sup>28</sup>.

Models were calibrated using an 80% random sample of the initial data and evaluated against the remaining 20% data using the area under the curve (AUC) of the receiver operation characteristic (ROC), the true skill statistic (TSS)<sup>51</sup> and the proportion correctly classified (PCC). Projections were performed 50 times per algorithm, each time selecting a different 80% random sample while verifying model accuracy against the remaining 20%. The evaluation statistics (AUC and TSS) were used to select the models to be assembled based on the matching between predictions and observations. Here, models with AUC < 0.8 or TSS values < 0.7 were disregarded when assembling the final model.

The final ensemble model was obtained by estimating the weighted mean of probabilities across the selected models per grid cell. This algorithm returns the predicted mean weighted by the selected evaluation method scores, in our case the AUC statistic score. The range of uncertainties was also calculated by estimating the confidence intervals around the mean of probabilities across the ensemble per grid cell.

The base map of the global administrative areas was downloaded from the Natural Earth (<https://www.naturalearthdata.com/>)<sup>52</sup>. All maps were produced using ArcGIS Desktop v10.5 (Environmental Systems Research Institute Inc., Redlands CA, USA).

### **Cross-validation and setting occurrence map**

We used spatial block cross-validation to validate the environmental model. Briefly, the whole area of Africa was split in-to five regular squares of 2,000km by 2,000km (“folds”), which were tagged from 1 to 5 in a random order. Single models were trained using all the data (occurrences, absences and pseudo-absences) within 4 out of the 5 folds (training data) and the data in the remaining fold (test data) were used to assess the quality of the predictive performance of the trained models (S1 Appendix). Under this approach to model evaluation, test datasets are more spatially independent from training datasets compared to those in a random internal cross-validation approach, reducing the risk of over-optimistic evaluation due to shared ecological characteristics of nearby locations. An ensemble model was constructed using the same specifications as the model run with regular cross-validation. Both models were compared using the Pearson’s correlation coefficient.

The resulting predictive map quantifies the environmental suitability for podoconiosis. In order to convert this continuous metric into a binary map outlining the distribution limits (i.e. ecological limits), a threshold value of suitability was determined above which podoconiosis occurrence was assumed to be possible. This cut-off represents the best trade-off between sensitivity, specificity and accuracy (fraction correctly classified). In addition, partial dependence functions were performed separately for two modelling approaches, GBM and RF, to visualise dependencies between the probability of podoconiosis occurrence and covariates. The partial dependence function shows the marginal effect of each covariate on the response after averaging the effects of all other covariates.

#### **Estimation of population at-risk and potential geographical overlapping with LF**

We estimated the number of individuals at risk by 2020 by overlaying the binary raster dataset displaying the potential suitability for podoconiosis occurrence on a gridded population density map<sup>53,54</sup> and calculating the population in cells considered to be within the limits of podoconiosis occurrence. The 95% credible interval of the population at risk was calculated based on the uncertainty in environmental suitability, by summarising the 50 predictions by mean and 95% credible intervals. Potential for overlapping with lymphatic filariasis (LF) was analysed by overlaying a gridded map of predicted LF occurrence published by Cano et al. (2014)<sup>55</sup> and our map of predicted occurrence for podoconiosis. Both maps were combined and the resulting map was used to estimate the population living in areas environmentally suitable for both podoconiosis and LF applying the above mentioned procedure.



## Results

### *Characteristic of the data*

The data search strategy identified 2,870 spatially unique data points from 42 studies undertaken between January, 1934, and May, 2019, in 12 countries in Africa. Of the 2,870 spatially referenced data points 1,311 (45.7%) represented podoconiosis presence. Almost all (99%) of the collected occurrences are distributed across eastern (Ethiopia, Kenya, Rwanda and Uganda) and western Africa (Cameroon, Equatorial Guinea and Sao Tomé and Príncipe) (Figure 1).

**Fig 1. Geographical distribution of presence and absence surveys used in the predictive map of occurrence.** Red dots correspond to survey locations where podoconiosis has been reported (n=1,311).

### *Environmental limits of podoconiosis suitability in Africa*

Elevation, annual precipitation, soil pH-H<sub>2</sub>O and clay fraction in the topsoil were the major contributors to the GBM and RF ensembles (S1 Appendix). The marginal effect plots for these covariates indicates that the probability of podoconiosis occurrence increases with annual precipitation, reaching a peak between 1,000mm and 1,800mm, and then declining. For elevation, we observed an increased risk in areas located over 1,000masl ('meters above sea level') and sustained up to 2,500masl. Regarding soil composition, acid soils (pH H<sub>2</sub>O<7) and soils rich in clay and silt are more likely to increase human risk of triggering podoconiosis (S1 Appendix).

We used Global Burden of Disease (GBD) regions<sup>56</sup> to present the results (S1 Appendix). In the Central Africa Region, three countries (Angola, Central African Republic and the Democratic Republic of Congo) were predicted to be suitable for the occurrence of podoconiosis. In the Democratic Republic of Congo, the suitability was predicted in the eastern mountainous part of the country, bordering with countries historically considered endemic (Uganda, Rwanda and Burundi). The mainland region of Equatorial Guinea was found to be unsuitable for the occurrence of podoconiosis, while Bioko Island- which has historically reported cases of podoconiosis, was still found to be suitable for the disease. Podoconiosis was predicted in Sao Tomé Island but not in Principe (Figure 2). For more detail, country maps displaying the predicted environmental suitability for podoconiosis and predicted overlapping with LF are provided in S2 Appendix.

**Fig 2. Environmental suitability for the occurrence of podoconiosis across Africa.** Probability of occurrence is provided in a 0 to 1 scale; orange colour indicates highest probability of occurrence (1) and green lowest probability (0). Lower (2.5%) and upper (97.5%) bound of presence limits were obtained from fitting an ensemble of 120 BRT submodels to predict sets of different risk maps.

The highest suitability for podoconiosis was predicted in East Africa Region; most parts of Ethiopia, Uganda, Rwanda and Burundi were predicted to be suitable for podoconiosis occurrence. Northern and western parts of Tanzania and the western part of Kenya were also found to be suitable. Parts of the highlands of Madagascar and northern Zambia (which borders with the Democratic Republic of Congo) were also predicted to be suitable. Patchy areas in northern Mozambique, mountainous area in Niassa province, and Malawi, Nyika Plateau and Viphya mountains at the north and around Zomba Mountain and Mount Mulanje at the south, were found to be suitable for podoconiosis occurrence (S1 Appendix & S2 Appendix).

Most of the Southern Africa Region was not predicted to be suitable for the occurrence of podoconiosis. Pockets of environmental suitability were predicted in South Africa, along the mountain ranges of Blouberg (Blue mountains) and the Drakensberg (Dragons mountains); the Swaziland border with the Drakensberg mountains in South Africa; and the eastern highlands of Zimbabwe (S1 Appendix & S2 Appendix).

In the West Africa Region, our model predicted suitable areas in Cameroon, Cape Verde, Guinea, Nigeria and Sao Tomé Island. In Cameroon, at-risk areas were delineated in most of the central and northwest parts, whereas in Nigeria, suitability appeared to be localized in the central and eastern parts of the country, the latter bordering with Cameroon. Interestingly, the risk map reflects environmental conditions suitable for podoconiosis in countries of northern Africa where the disease is considered eliminated (Morocco and Tunisia) (Figure 2 and S2 Appendix).

Validation statistics indicated an excellent predictive performance of all the algorithms (S1 Appendix). However, RF and GBM outperformed the other models with AUC scores of 0.88 (95%CI: 0.88 – 0.9) and 0.89 (95%CI: 0.89 – 0.9), respectively. An environmental suitability threshold of 0.389 provided the best discrimination between presence and absence records; sensitivity 80.1%, specificity 85.5% and AUC score of 0.921, and this threshold value was used to classify the environmental suitability map into a binary map of the environmental limits of occurrence (Figure 3). The final ensemble model showed a high correlation (Pearson's correlation coefficient: 0.9902) with a model constructed using regular spatial blocks for cross-validation, indicating a high stability of the model irrespective of the method chosen for cross-validation and model selection (S1 Appendix).

**Figure 3. Predicted occurrence of podoconiosis in Africa with the lower (2.5%) and upper (97.5%) bounds of the occurrence limits** based on the optimal threshold of environmental suitability (0.389).

#### *Estimating population at risk and geographical overlapping with LF*

The population living in areas environmentally suitable for podoconiosis was estimated to be over 114.5 million (95% UI: 109.4 – 123.9) (Table 1). The largest proportion of the population at risk was found in east Africa (81.7%), followed by central Africa (10.9%). Northern, Southern and West African countries only accounted for 7.4% of the total population at-risk. Geographical overlap between podoconiosis and LF was mainly predicted in Eastern, Western and central Africa regions (Figure 4). Large areas of potential co-occurrence of podoconiosis and LF were predicted in Uganda, north of Lake Victoria, in Guinea, and in more restricted areas in Cameroon, Ethiopia and Madagascar. The population living in areas environmentally suitable for podoconiosis and LF was estimated to be 16.9 million, 14.7% of the population at risk for podoconiosis (Table 2). Eastern African countries accounted for 82.0% of the total population living in areas of potential geographic overlap for podoconiosis and LF.

**Fig 4. Predicted occurrence of podoconiosis and lymphatic filariasis in Africa.** Environmental suitability for lymphatic filariasis according to the predictive map published by Cano et al. (2014).

**Table 1. Estimates of population living in areas environmentally suitable for podoconiosis in Africa.**  
Estimates were obtained from a gridded map of population density for 2020 ([www.worldpop.org](http://www.worldpop.org)).

| Africa Region | Population at risk | 95% UI                            |
|---------------|--------------------|-----------------------------------|
| Central       | 12,529,248         | (11,592,258 - 14,413,843)         |
| East          | 93,507,570         | (90,335,551- 98,217,585)          |
| North         | 360,038            | (300,847- 480,627)                |
| South         | 3,065,753          | (2,631,172- 4,458,757)            |
| West          | 5,014,597          | (4,517,515- 6,373,689)            |
| <b>Total</b>  | <b>114,477,207</b> | <b>(109,377,342- 123,944,501)</b> |

**Table 2. Estimates of population living in areas with overlapping risk of podoconiosis and lymphatic filariasis in Africa.**

| Africa Region | Only podoconiosis at risk population 2020 | Only LF at risk population | At risk population in LF and podoconiosis overlapping areas |
|---------------|-------------------------------------------|----------------------------|-------------------------------------------------------------|
| Central       | 11,660,060                                | 15,758,872                 | 869,188                                                     |
| East          | 79,675,440                                | 36,548,506                 | 13,832,130                                                  |
| North         | 360,038                                   | 42,376,960                 | 0                                                           |
| South         | 3,063,100                                 | 36,686                     | 2,653                                                       |
| West          | 2,856,736                                 | 182,910,848                | 2,157,861                                                   |
| <b>Total</b>  | <b>97,615,374</b>                         | <b>277,631,872</b>         | <b>16,861,833</b>                                           |

### *Risk of podoconiosis in Implementation Units (IUs) in Africa*

Based on the optimal threshold of environmental suitability (0.389), of the total 5,712 WHO implementation units (typically second administrative-level units, such as districts) in Africa 1,655 (29.0%) IUs were found to be environmentally suitable for podoconiosis. The majority of IUs with high environmental suitability are located in Angola (80 IUs), Cameroon (170 IUs), the DRC (244 IUs), Ethiopia (495 IUs), Kenya (217 IUs), Uganda (116 IUs) and Tanzania (112 IUs). Of the 1,655 environmental suitable IUs, 960 (58.0%) require more detailed community-level mapping (Figure 5).

**Fig 5. IU-level suitability classification based on WHO geographic units for implementation of control interventions.** Red identifies suitable IUs which are not mapped and green identifies suitable IUs mapped for podoconiosis.

## **Discussion**

Our model predicted environmental suitability for podoconiosis in many areas in Africa, with the strongest prediction largely in East, West and Central Africa Regions. In agreement with previous work, our model showed podoconiosis environmental suitability is largely influenced by annual precipitation, elevation, clay fraction and pH of the soil<sup>17-19,36,47</sup>. The novelty of this study was in translating suitability to the IU level: aggregated risk at the IU level aids in mapping podoconiosis. These findings are not only useful in understanding the risk, population at risk, and the environmental limits of podoconiosis across Africa, but also are valuable for targeted mapping of podoconiosis in the remaining endemic countries.

Our model predicted suitability in 29 countries in Africa, nonetheless we have identified 18 countries with evidence of presence of podoconiosis in Africa previously. This is a clear reflection that suitability only reflects the availability of ecological suitability for the occurrence of podoconiosis, not necessarily the presence of the disease currently. One good example is that historical evidence indicates the elimination of podoconiosis from northern African countries (e.g. Algeria, Morocco and Tunisia)<sup>3</sup>, nonetheless our model predicted suitable areas in parts of these countries. Although the disease has been eliminated, the ecological characteristics which are suitable for the occurrence of podoconiosis, such as the soil characteristics, remain the same. Hence our results should be put into context. For this reason, we have restricted the list of IUs needing mapping to those 18 countries with evidence of podoconiosis presence.

Mapping podoconiosis is an important prerequisite for the initiation of data-driven national control programmes<sup>57</sup>. Surveying all districts in suspected endemic countries will be resource intensive and will take time. Here we provide model-based guidance to identify environmentally suitable IUs eligible for mapping activity. By focusing efforts in suitable countries and ensuring suitable IUs within those countries, resources can be targeted and used efficiently. Our prediction can also guide surveillance efforts, targeting areas predicted to be suitable. Here we are not ruling out the need to conduct mapping, our results may provide evidence in prioritizing mapping surveys and surveillance efforts to high yield areas.

Environmental suitability of podoconiosis is predicted in ten countries with no historical report of the disease (including Côte d'Ivoire, Congo, Ghana, Guinea, Malawi, Lesotho, Swaziland, South Africa, Zambia and Zimbabwe)<sup>3,12</sup>. As podoconiosis is a gene-environment-behaviour interaction<sup>13,58</sup>, it is possible that it has not been reported because other elements (e.g. genetic susceptibility or lack of footwear) are not present in these countries. Several have strong health systems, making it unlikely that cases are missed without being detected<sup>59-61</sup>. We encourage these countries to increase their index of suspicion for podoconiosis when lymphoedema cases are diagnosed and treated. We have identified areas suitable for both podoconiosis and LF. This has important implications in terms of mapping and implementation of interventions. Areas where the LF programme has already advanced, the existing platform and programme activities such as the transmission assessment surveys (TAS) can be used to integrate podoconiosis mapping. Once the mapping is completed integrated morbidity movement services can be provided to all cases, as has been found to be feasible in Ethiopia<sup>62</sup>.

Delineating the potentially suitable areas for the occurrence of podoconiosis in Africa has several benefits. First, it provides a framework for targeted mapping of podoconiosis in known and suspected endemic countries by limiting this to areas suitable for the occurrence of the disease. Second, it provides a basis to stratify surveillance activities by identifying areas with different level of risk. Finally, it provides an important input for estimating the burden of podoconiosis at the continent level.

## Limitations

There are some limitations of our analysis. First, our predictive mean environmental suitability is not a measure of disease prevalence or incidence. Our model characterised the similarity between locations based on covariates included with locations with confirmed cases of podoconiosis. This neither measures the magnitude of the problem nor confirms the presence of podoconiosis, it only measures the environmental suitability. Nonetheless,

podoconiosis is a gene-environment disease<sup>13,58</sup>. To develop the disease, people must be exposed to the environment and must also be genetically susceptible. This means we might overestimate the population at risk by assuming all individuals living in areas of environmental suitability are at risk of podoconiosis. Nonetheless, our approach is stringent in identifying potential endemic areas for mapping, rather than missing potential endemic areas. Second, only a few of the surveys were conducted at the national level. Most of the surveys were conducted in potentially endemic areas, where investigators observed high prevalence of lymphoedema cases. Therefore, our modelling might be characterising areas with high prevalence rather than the whole spectrum of prevalence. Third, we were not able to account for important covariates, including footwear use, which is not available for analysis.

## Conclusions

In conclusion, our work has highlighted considerable environmental suitability of podoconiosis in Africa with a significant population at risk in the continent. We have identified areas suitable for podoconiosis, which needs priority both for mapping and intervention. Importantly, we have determined the number of IUs which require mapping based on the optimal cut-off point for suitability. Targeted mapping and intensified surveillance are required in areas where suitability is determined. We have also identified areas where podoconiosis and LF risk overlaps, and where it is possible to use the existing platforms to identify podoconiosis cases in LF-endemic districts, and establish a mechanism whereby podoconiosis cases can access morbidity management services in co-endemic areas. Thus, while our results and maps guide surveillance and survey activities to better define the local distribution and burden of podoconiosis in suitable areas, we encourage countries to collect primary data in pursuit of accelerating the progress towards a world without podoconiosis.

# References

- 1 Davey G, Tekola F & Newport MJ. Podoconiosis: non-infectious geochemical elephantiasis. *Trans R Soc Trop Med Hyg.* **101**, 1175-1180 (2007 ).
- 2 Molyneux DH. Tropical lymphedemas--control and prevention. *N Engl J Med.* **366**, 1169-1171 (2012).
- 3 Price E. Podoconiosis:Non-filarial Elephantiasis. *Oxford Medical Publications, Oxford, UK* (1990).
- 4 Mousley E, Deribe K, Tamiru A & Davey G. The impact of podoconiosis on quality of life in Northern Ethiopia. *Health Qual Life Outcomes* **11** (2013).
- 5 Tekola F, HaileMariam D & Davey G. Economic costs of endemic non-filarial elephantiasis in Wolaita Zone, Ethiopia. *Tropical Medicine & International Health* **11**, 1136-1144 (2006).
- 6 Bartlett J *et al.* Depression and disability in people with podoconiosis: a comparative cross-sectional study in rural northern Ethiopia. *Int Health* **8**, 124-131 (2015).
- 7 Tora A, Davey G & Tadele G. A qualitative study on stigma and coping strategies of patients with podoconiosis in Wolaita zone, Southern Ethiopia. *Int Health* **3**, 176-181 (2011).
- 8 Yakob B, Deribe K & Davey G. High levels of misconceptions and stigma in a community highly endemic for podoconiosis in southern Ethiopia. *Trans R Soc Trop Med Hyg* **102**, 439-444 (2008).
- 9 Deribe K *et al.* The feasibility of eliminating podoconiosis. *Bull World Health Organ* **93**, 712-718 (2015).
- 10 Negussie H *et al.* Podoconiosis treatment in northern Ethiopia (GoLBet): study protocol for a randomised controlled trial. *Trials* **16** (2015).
- 11 Negussie H *et al.* Lymphoedema management to prevent acute dermatolymphangioadenitis in podoconiosis in northern Ethiopia (GoLBet): a pragmatic randomised controlled trial. . *Lancet Glob Health* **6**, e795-e803 (2018).
- 12 Deribe K, Cano J, Trueba ML, Newport MJ & Davey G. Global epidemiology of podoconiosis: a systematic review. *PLoS Negl Trop Dis* **12**, e0006324 (2018).
- 13 Tekola Ayele F *et al.* HLA class II locus and susceptibility to podoconiosis. *N Engl J Med* **366**, 1200-1208 (2012).
- 14 Yakob B, Deribe K & Davey G. Health professionals' attitudes and misconceptions regarding podoconiosis: potential impact on integration of care in southern Ethiopia. *Trans R Soc Trop Med Hyg* **104**, 42-47. (2010).
- 15 Sime, H. *et al.* Results of a confirmatory mapping tool for Lymphatic filariasis endemicity classification in areas where transmission was uncertain in Ethiopia.

- 437 *PLOS Neglected Tropical Diseases* **12**, e0006325, doi:10.1371/journal.pntd.0006325  
438 (2018).
- 439 16 Rebollo MP *et al.* Shrinking the Lymphatic Filariasis Map of Ethiopia: Reassessing  
440 the Population at Risk through Nationwide Mapping. *PLoS Negl Trop Dis* **9**,  
441 e0004172 (2015).
- 442 17 Deribe K *et al.* Estimating the number of cases of podoconiosis in Ethiopia using  
443 geostatistical methods. *Wellcome Open Res* **2** (2017).
- 444 18 Deribe K *et al.* Mapping and modelling the geographical distribution and  
445 environmental limits of podoconiosis in Ethiopia. *PLoS Negl Trop Dis* **9**, e0003946  
446 (2015).
- 447 19 Deribe K *et al.* Predicted distribution and burden of podoconiosis in Cameroon. *BMJ*  
448 *Glob Health* **3**, e000730 (2018).
- 449 20 Deribe, K. *et al.* Geographical distribution and prevalence of podoconiosis in  
450 Rwanda: a cross-sectional country-wide survey. *Lancet Glob Health* **7**, e671-e680,  
451 doi:10.1016/S2214-109X(19)30072-5 (2019).
- 452 21 Elvidge, C. D., Baugh, K. E., Kihn, E. A., Kroehl, H. W. & Davis, E. R. Mapping city  
453 lights with nighttime data from the DMSP operational linescan system. *Photogramm*  
454 *Eng Rem S* **63**, 727-734 (1997).
- 455 22 Doll, C. N. H., Muller, J. P. & Morley, J. G. Mapping regional economic activity from  
456 night-time light satellite imagery. *Ecol Econ* **57**, 75-92 (2006).
- 457 23 Noor, A. M., Alegana, V. A., Gething, P. W., Tatem, A. J. & Snow, R. W. Using  
458 remotely sensed night-time light as a proxy for poverty in Africa. *Popul Health Metr*  
459 **6**, 5, doi:10.1186/1478-7954-6-5 (2008).
- 460 24 Alemu G, Tekola Ayele F, Daniel T, Ahrens C & Davey G. Burden of podoconiosis  
461 in poor rural communities in Gulliso woreda, West Ethiopia. *PLoS Negl Trop Dis.* **5**,  
462 e1184 (2011).
- 463 25 Kihembo C *et al.* Risk Factors for Podoconiosis: Kamwenge District, Western  
464 Uganda, September 2015. *Am J Trop Med Hyg* **96**, 1490-1496 (2017).
- 465 26 Wanji S *et al.* Elephantiasis of non-filarial origin (podoconiosis) in the highlands of  
466 north-western Cameroon. *Ann Trop Med Parasitol.* **102**, 529-540 (2008).
- 467 27 WHO. Global programme to eliminate lymphatic filariasis: progress report, 2017.  
468 *Wkly Epidemiol Rec* **91**, 589-604 (2018).
- 469 28 Deribe, K. *et al.* Mapping the global distribution of podoconiosis: Applying an  
470 evidence consensus approach. *PLoS Negl Trop Dis* **13**, e0007925,  
471 doi:10.1371/journal.pntd.0007925 (2019).
- 472 29 Deribe K *et al.* The global atlas of podoconiosis. *Lancet Glob Health* **5**, e477-e479  
473 (2017).



- 474 30 Kahle D & Wickham H. ggmap: Spatial Visualization with ggplot2. *The R Journal* **5**,  
475 144- 161 (2013).
- 476 31 Salmon M. Opencage: Interface to the OpenCage API. R package version 0.1.2. 2017.
- 477 32 Price E. The association of endemic elephantiasis of the lower legs in East Africa with  
478 soil derived from volcanic rocks. *Trans R Soc Trop Med Hyg* **4**, 288- 295 (1976).
- 479 33 Geographic Names Database. NGA-GEOnet Names Server (Country Files). Avaibale  
480 at <http://earth-info.nga.mil/gns/html/index.html>. Accessed on July 08,2019.
- 481 34 ISODP Project. Fuzzy Gazetteer. Available at [http://isodp.hof-](http://isodp.hof-university.de/fuzzyg/query/)  
482 [university.de/fuzzyg/query/](http://isodp.hof-university.de/fuzzyg/query/). Accessed on August 07, 2019.
- 483 35 Open Street Map. Open Street Map. Available at <http://www.openstreetmap.org/>.  
484 Accessed on October 7, 2019.
- 485 36 Deribe K *et al.* Epidemiology and individual, household and geographical risk factors  
486 of podoconiosis in Ethiopia: results from the first nationwide mapping. *Am J Trop*  
487 *Med Hyg* **92**, 148–158 (2015).
- 488 37 NASA LP DAAC. *NASA LP DAAC: MOD13Q1 Vegetation Indices 16-Day L3*  
489 *Global 250m*. Avaibale at <https://lpdaac.usgs.gov>. Accessed on 25 Februray 2019,  
490 <<https://lpdaac.usgs.gov>> (
- 491 38 NASA LP DAAC. *NASA LP DAAC: MOD11A2 Land Surface Temperature and*  
492 *Emissivity 8-Day L3 Global 1km*. Available at <https://lpdaac.usgs.gov>. Accessed on  
493 23 July 2019, <<https://lpdaac.usgs.gov>> (
- 494 39 WorldClim.
- 495 40 Hijmans, R. J., Cameron, S. E., Parra, J. L., Jones, P. G. & Jarvis, A. Very high  
496 resolution interpolated climate surfaces for global land areas. *International Journal of*  
497 *Climatology* **25**, 1965-1978, doi:10.1002/joc.1276 (2005).
- 498 41 Fick, S. E. & Hijmans, R. J. WorldClim 2: new 1-km spatial resolution climate  
499 surfaces for global land areas. *International Journal of Climatology* **37**, 4302-4315  
500 (2017).
- 501 42 CGIAR-CSI. *Consortium for Spatial Information*. Available at [http://www.cgiar-](http://www.cgiar-csi.org/)  
502 [csi.org/](http://www.cgiar-csi.org/). Accessed on June 16, 2019, <<http://www.cgiar-csi.org/>> (
- 503 43 ISRIC - World Soil Information. Soil property maps of Africa at 1 km. Available for  
504 download at [www.isric.org](http://www.isric.org). Accessed on 14 June 2019.
- 505 44 *OpenStreetMap contributors*. Available at <https://www.openstreetmap.org/copyright>.  
506 Accessed on April 16,2019, <<https://planet.openstreetmap.org>> (2015).
- 507 45 Topf J & Ramm F. *Geofabrik*. Available at <http://www.geofabrik.de/>. Accessed on 10  
508 November 2019, <[www.geofabrik.de](http://www.geofabrik.de/)> (2007).



509 46 Thuiller, W., Lafourcade, B., Engler, R. & Araujo, M. B. BIOMOD - a platform for  
510 ensemble forecasting of species distributions. *Ecography* **32**, 369-373 (2009).

511 47 Deribe K *et al.* Geographical distribution and prevalence of podoconiosis in Rwanda:  
512 a cross-sectional country-wide survey. *Lancet Glob Health* **7**, e671-e680 (2019).

513 48 Deribe, K. *et al.* Mapping the geographical distribution of podoconiosis in Cameroon  
514 using parasitological, serological, and clinical evidence to exclude other causes of  
515 lymphedema. *PLoS neglected tropical diseases* **12**, e0006126 (2018).

516 49 Pigott, D. M. *et al.* Global Distribution Maps of the Leishmaniasis. *eLife*, e02851,  
517 doi:10.7554/eLife.02851 (2014).

518 50 Bhatt, S. *et al.* The global distribution and burden of dengue. *Nature* **496**, 504-507,  
519 doi:nature12060 [pii]  
520 10.1038/nature12060 (2013).

521 51 Liu, C. R., White, M. & Newell, G. Measuring and comparing the accuracy of species  
522 distribution models with presence-absence data. *Ecography* **34**, 232-243 (2011).

523 52 Natural Earth. Natural Earth. Available at <https://www.naturalearthdata.com/>.  
524 Accessed 02 November, 2019.

525 53 Linard C *et al.* Population distribution, settlement patterns and accessibility across  
526 Africa in 2010. *PLoS ONE* **7**, e31743 (2012).

527 54 WorldPop. *The AfriPop demography project.* Available at  
528 [http://www.clas.ufl.edu/users/atatem/index\\_files/demographydata.htm/](http://www.clas.ufl.edu/users/atatem/index_files/demographydata.htm/). Accessed on  
529 November 10, 2019,  
530 <[http://www.clas.ufl.edu/users/atatem/index\\_files/demographydata.htm](http://www.clas.ufl.edu/users/atatem/index_files/demographydata.htm)> (

531 55 Cano, J. *et al.* The global distribution and transmission limits of lymphatic filariasis:  
532 past and present. *Parasites & vectors* **7**, 466, doi:10.1186/PREACCEPT-  
533 4166218931344497 (2014).

534 56 Murray CJ *et al.* GBD 2010: design, definitions, and metrics. *Lancet* **380**, 2063-2066  
535 (2012).

536 57 Marks M & Mitja O. Prevalence surveys for podoconiosis and other neglected skin  
537 diseases: time for an integrated approach. *Lancet Glob Health* **7**, e554-e555. (2019).

538 58 Davey G *et al.* Podoconiosis: a tropical model for gene-environment interactions? .  
539 *Trans R Soc Trop Med Hyg* **101**, 91-96. (2007).

540 59 GBD 2016 Healthcare Access and Quality Collaborators. Measuring performance on  
541 the Healthcare Access and Quality Index for 195 countries and territories and selected  
542 subnational locations: a systematic analysis from the Global Burden of Disease Study  
543 2016. *Lancet* **391**, 2236-2236 (2018).

544 60 Global Burden of Disease Collaborative Network. Global Burden of Disease Study  
545 2015 (GBD 2015) Socio-Demographic Index (SDI) 1980–2015. Seattle, United  
546 States: Institute for Health Metrics and Evaluation (IHME). (2016).

547 61 Global Burden of Disease Collaborative Network. Global Burden of Disease Study  
548 2017 (GBD 2017) Covariates 1980-2017. Seattle, United States: Institute for Health  
549 Metrics and Evaluation (IHME). . (2018).

550 62 Deribe K *et al.* Integrated morbidity management for lymphatic filariasis and  
551 podoconiosis, Ethiopia. *Bull World Health Organ* **95**, 652-656 (2017).

552

553

554

555    **Supporting information**

556    **S1 Appendix:** covariates, marginal effects.

557    **S2 Appendix:** country level risk prediction.

558

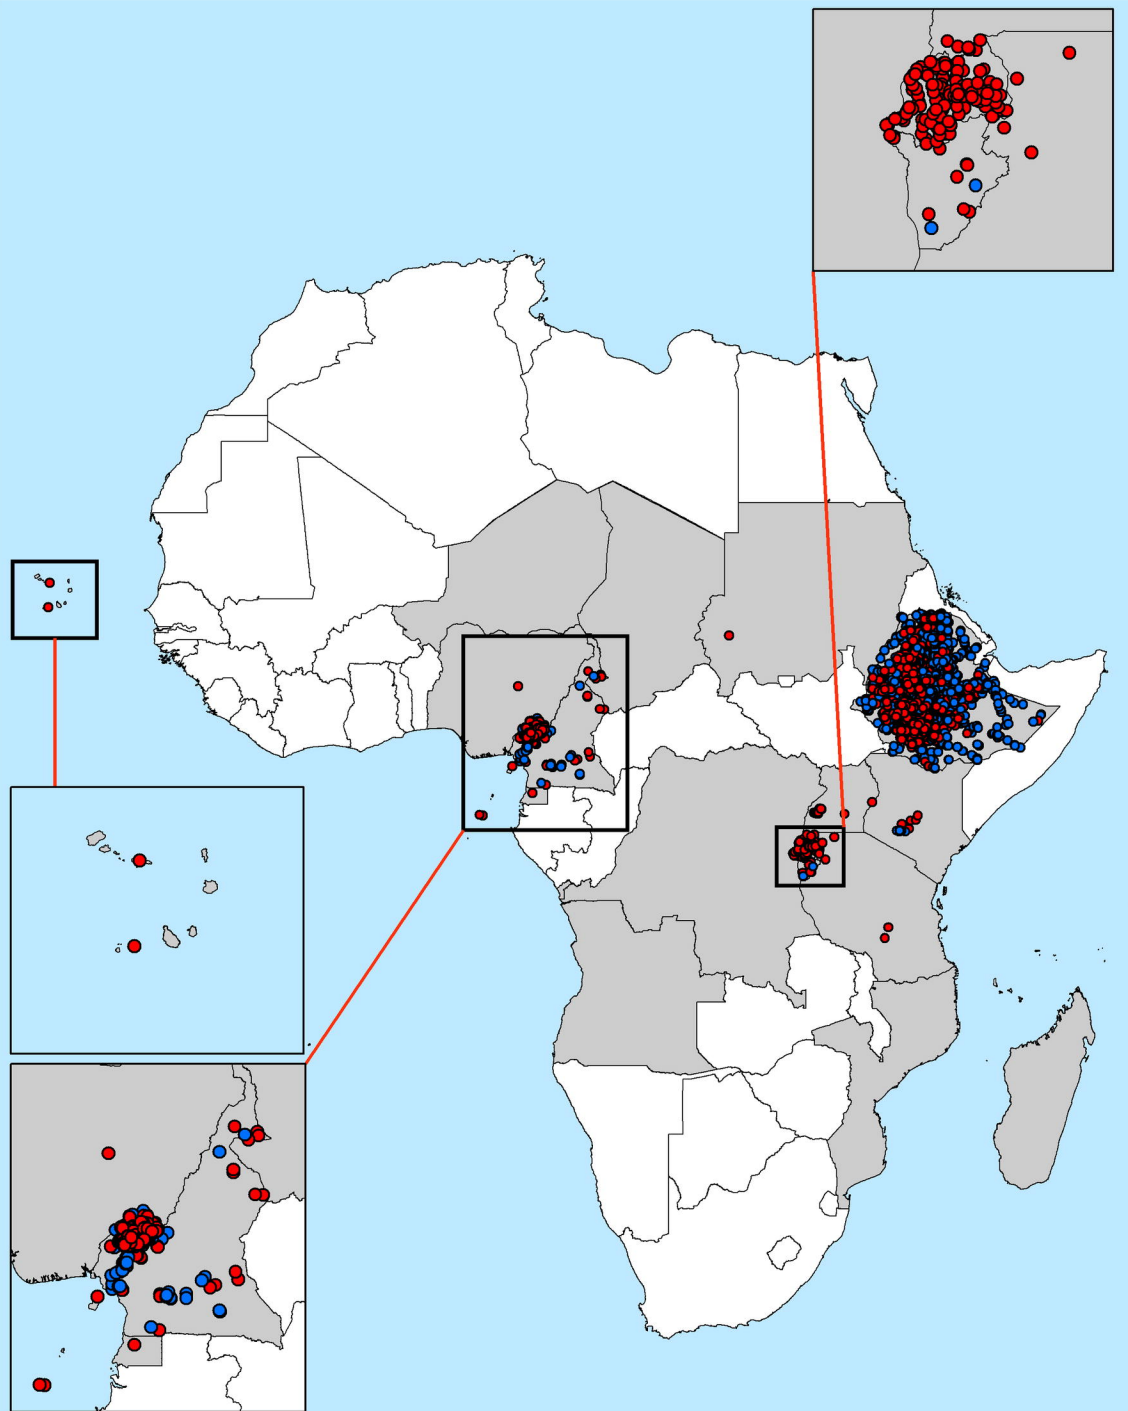

**Podoconiosis Occurrences**

- Absence
- Presence
- Suspected presence or indeterminate

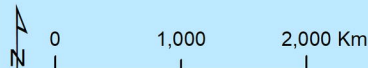

**Podoconiosis**

*Environmental  
Suitability*

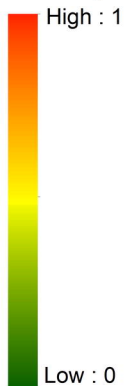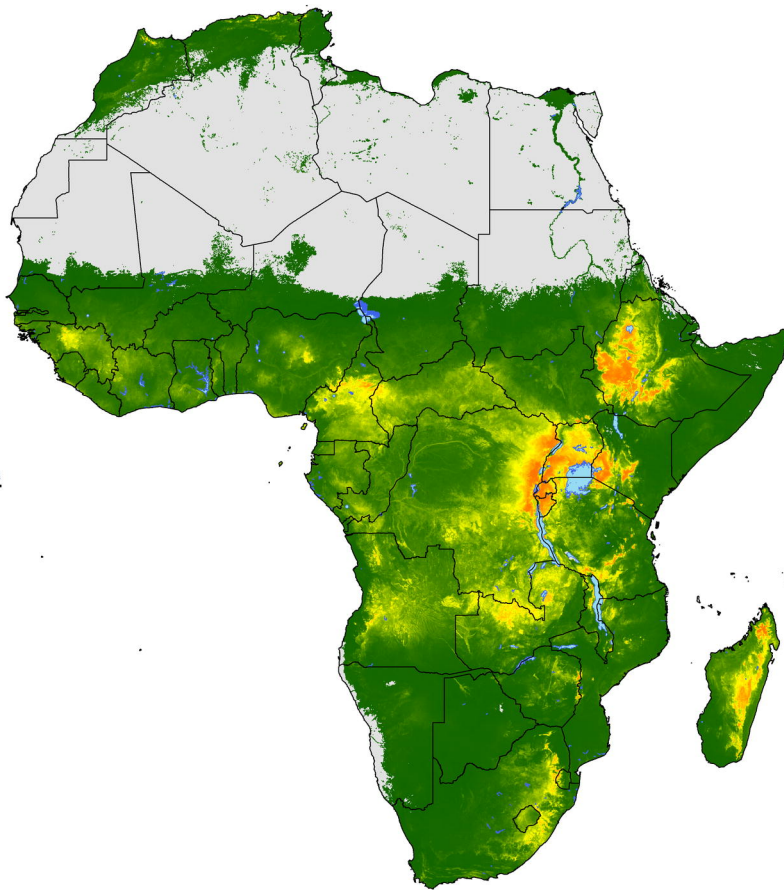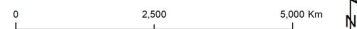

**Lower bound**

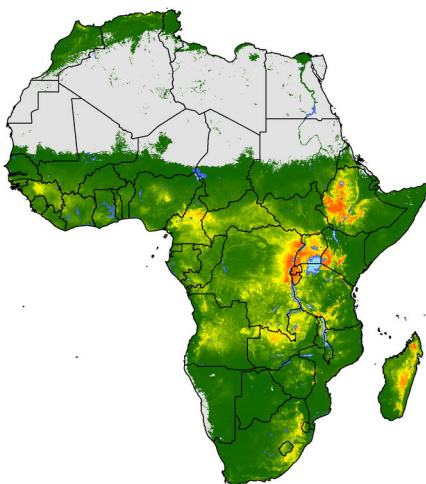

**Upper bound**

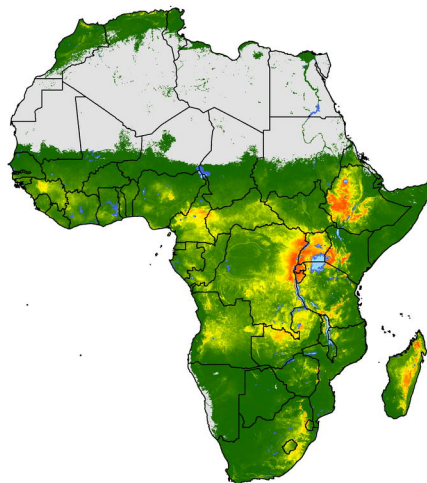

# **Predicted Occurrence of Podoconiosis**

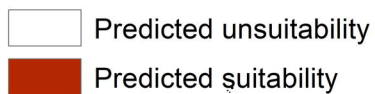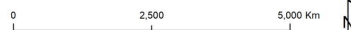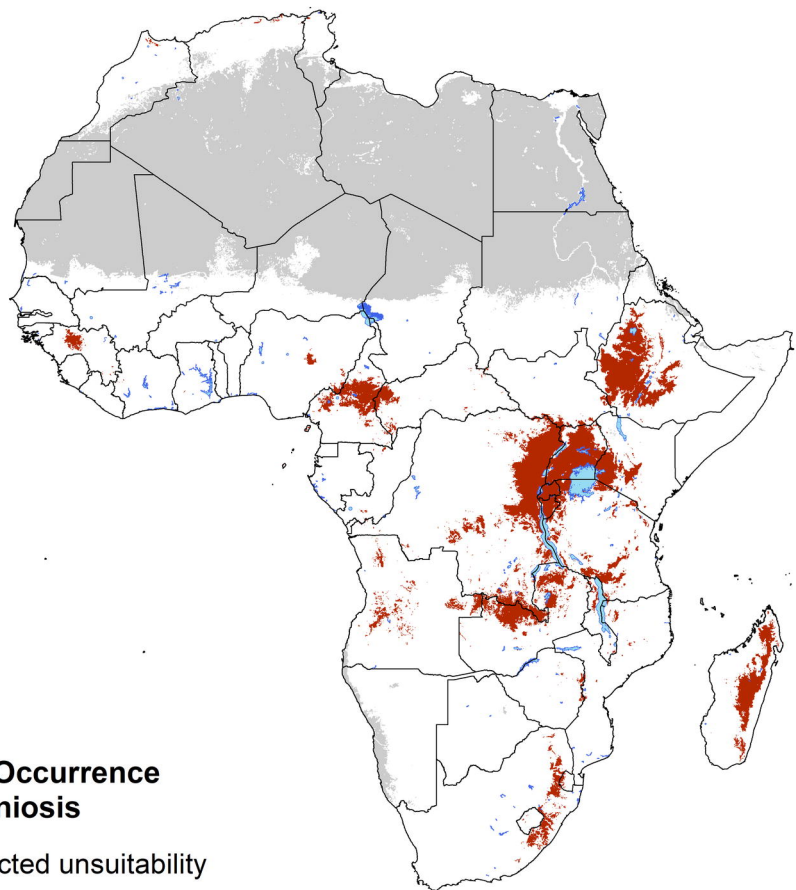

**Lower bound**

**Upper bound**

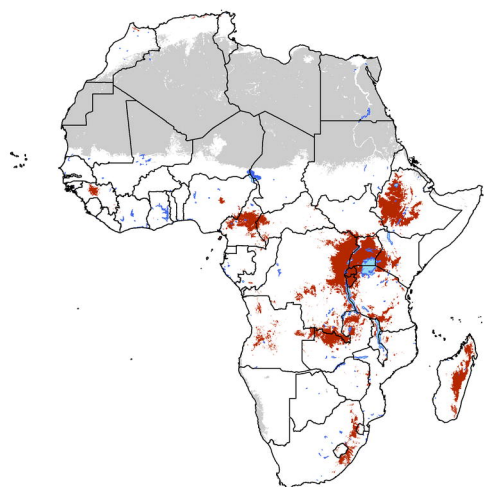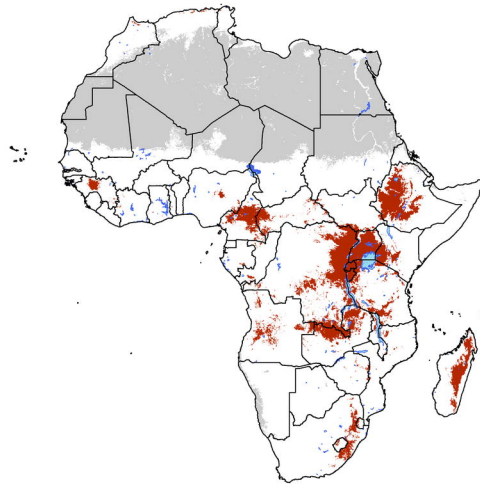



### Predicted Occurrence of Podoconiosis

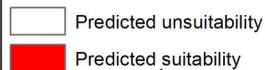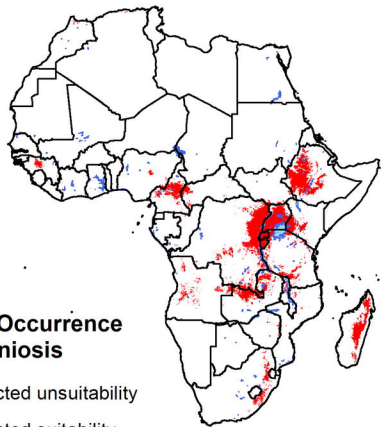

### Predicted Occurrence of Lymphatic Filariasis

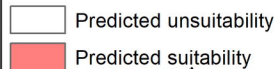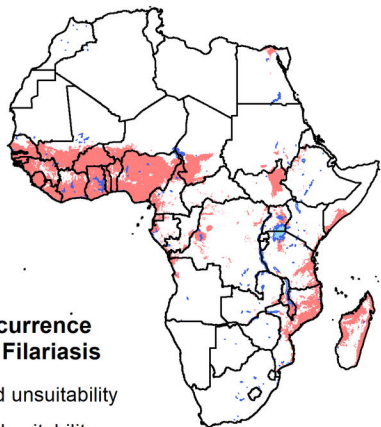

### Predicted Occurrence Podoconiosis + LF

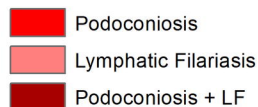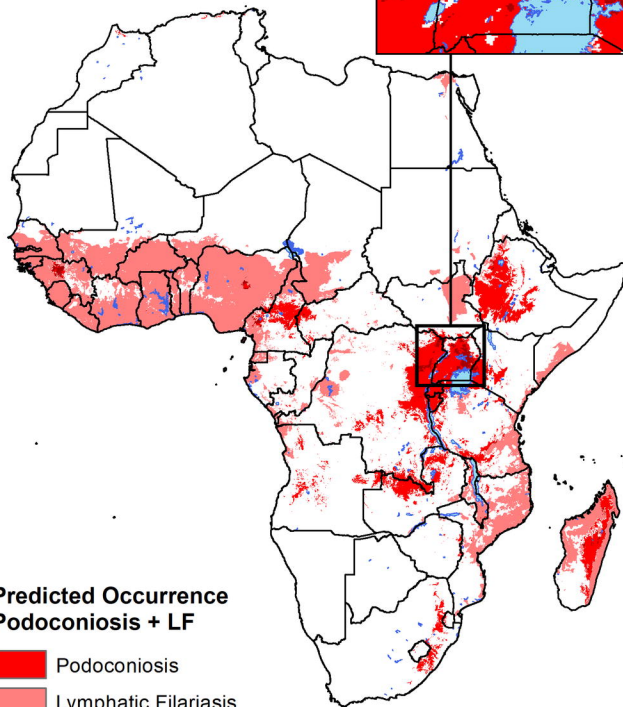

0 1,000 2,000 Km

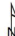

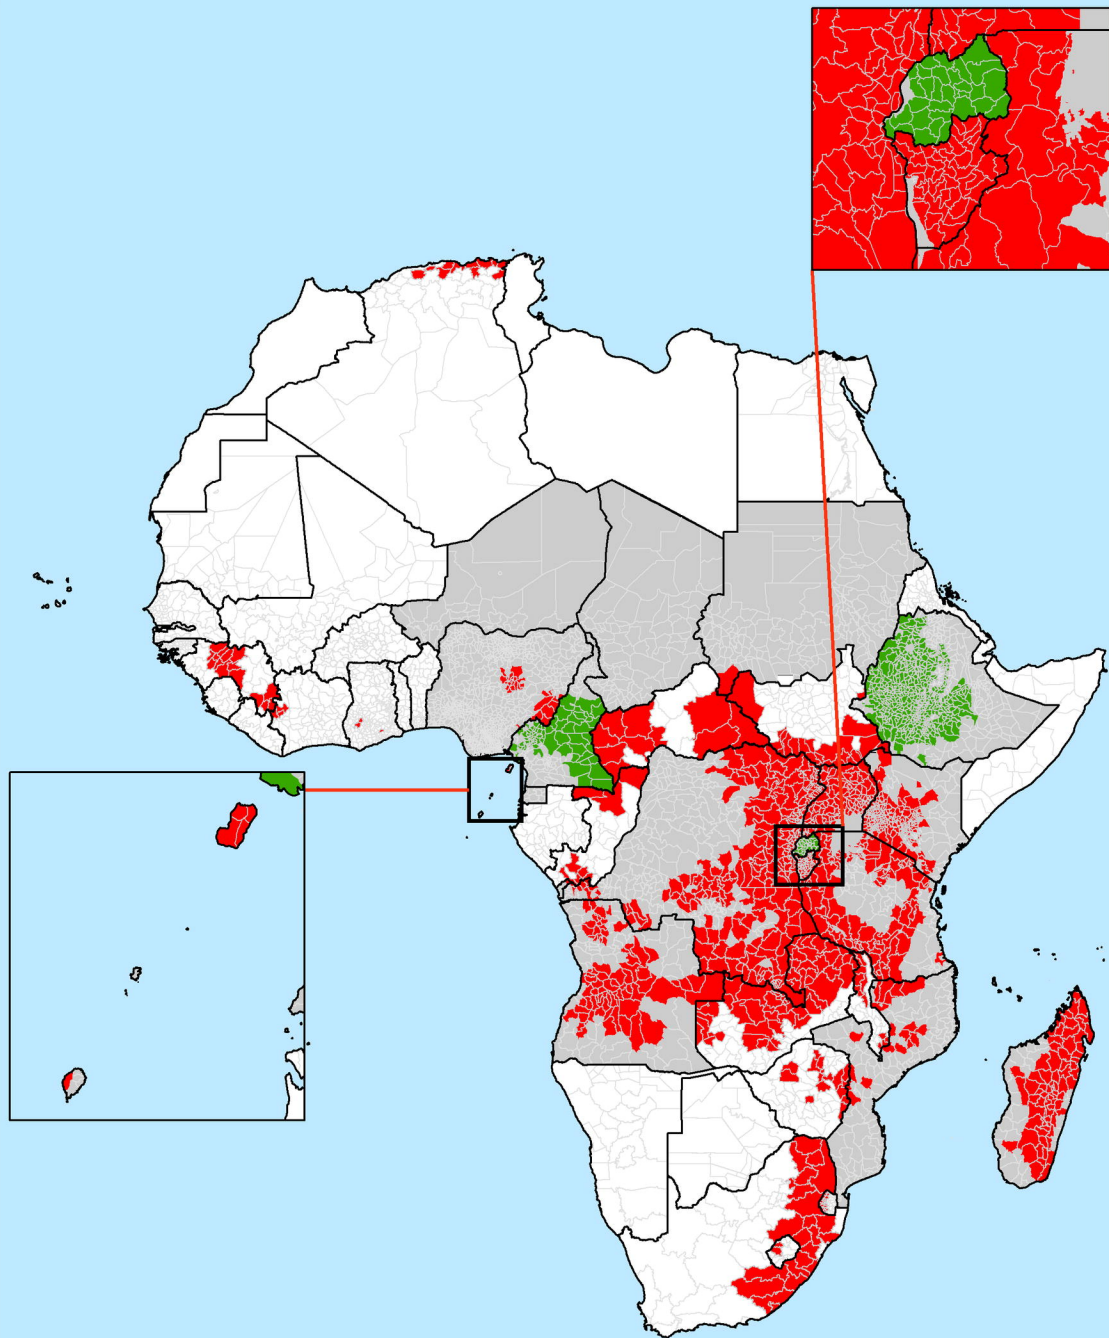

**Treatment Implementation Units  
Suitable for Podoconiosis**

- IU Suitable for Podoconiosis - Mapped
- IU Suitable for Podoconiosis - Unmapped
- Implementation Units (IU)
- Suspected presence or indetermined

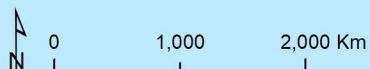

Source: https://www.biorxiv.org/content/10.1101/2020.03.04.977827v1.full.pdf
